# Supplementary material
Source: PubMed Central journal article supplement (PMC4673484)
Supplement: supp_jlb.4A0814-395RR_Supplemental_Figure1.pdf [file supp_jlb.4A0814-395RR_Supplemental_Figure1.pdf]

Supplemental Figure 1

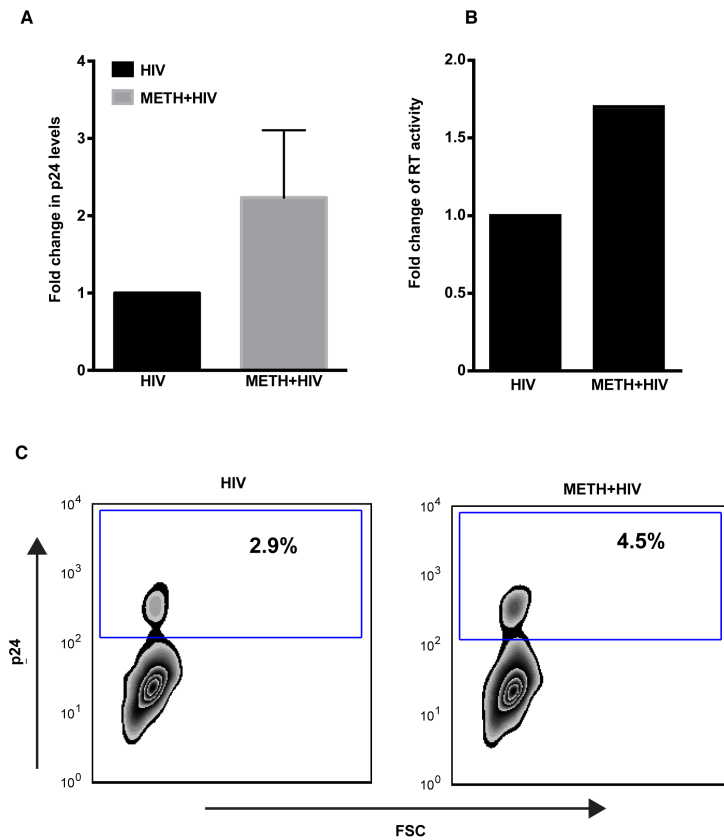

**Figure S1. METH increases p24 expression in HIV-1 infected T cells.**

PBMCs were treated with or without METH for 24h and then infected with HIV-1<sub>ADA</sub> for 4h, washed and cultured in complete RPMI medium with IL-2. PBMCs were harvested on day 6 post-infection and p24 expression in CD3<sup>+</sup> T cells was analyzed by ELISA and flow cytometry. HIV-RT analysis was performed from culture supernatants of day 6 of infection. (A) HIV p24 levels were assayed using ELISA kit and fold change in the p24 levels is represented in the graph. HIV infection in a METH exposed environment induced more p24 than HIV alone.

Bars are average fold change of p24 levels from three independent experiments assayed from supernatants of day 3 culture after HIV infection. A clear trend in the increase of p24 levels is seen in the HIV infected cultures exposed to METH.

(B) Bar graph showing fold change in the RT activity. One representative figure of at least three independent testings. (C) FACS plots of p24 expression. One representative of two independent experiments from different donors.
